# Supplementary material
Source: PubMed Central journal article supplement (PMC2718370)
Supplement: 0903895106_0903895106SI.pdf [file 0903895106_0903895106SI.pdf]

# Supporting Information

Kreslavsky et al. 10.1073/pnas.0903895106

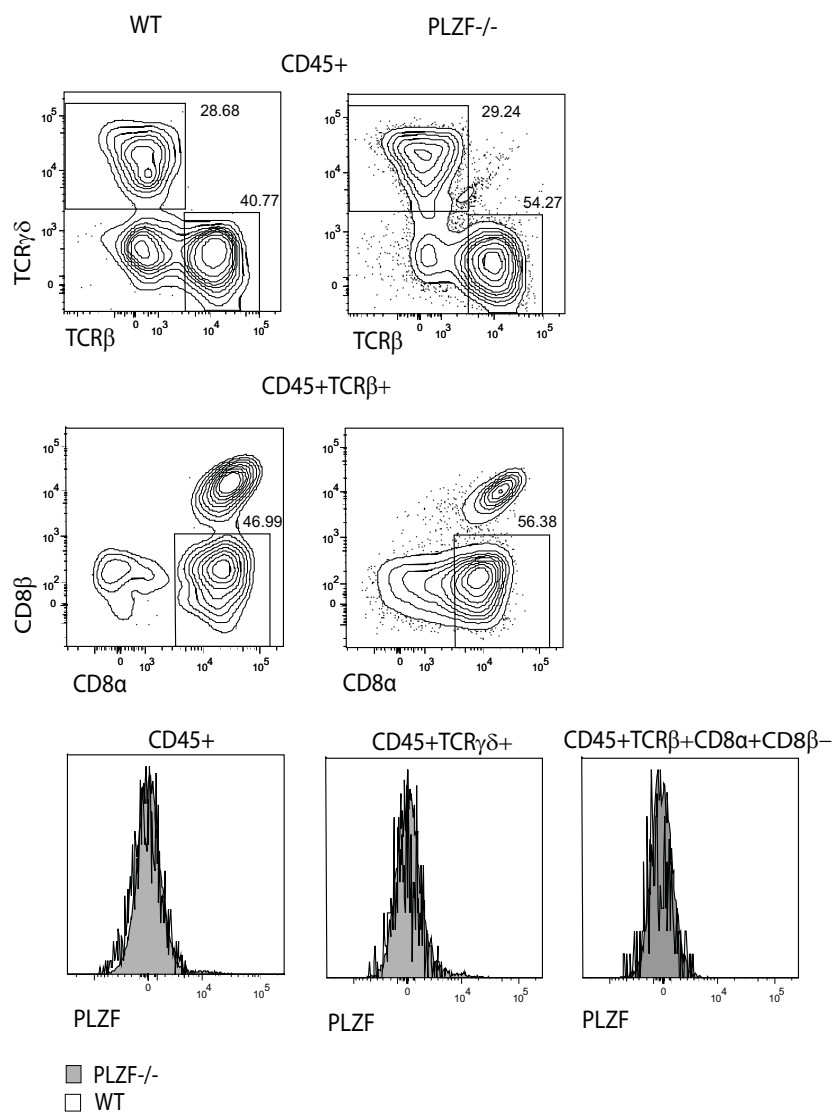

**Fig. S1.** PLZF is not expressed by intestinal intraepithelial T cells. Intraepithelial lymphocytes were isolated from small intestine of WT and PLZF<sup>-/-</sup> mice, stained for surface expression of CD45, CD8 $\alpha$ , CD8 $\beta$ , TCR- $\delta$ , TCR $\beta$ , intracellular expression of PLZF, and analyzed by FACS. Gates applied as indicated.
